# Supplementary material for: Occlusion-Based Three-Dimensional Craniofacial Anthropometric and Symmetric Evaluation in Preadolescences: A Comparative COHORT Study
Source: MDPI journal article supplement (doi:10.3390/jcm12155017), 2023-07-30
Supplement: s1 [file s1]

Supplementary Table S1.

1

| Parameter                 | Intraclass correlation co-<br>efficient | 95% confidence interval |             |
|---------------------------|-----------------------------------------|-------------------------|-------------|
|                           |                                         | Lower limit             | Upper limit |
| Sn to N-Pg (mm)           | 0.895                                   | 0.793                   | 0.948       |
| N-Sto (mm)                | 0.908                                   | 0.789                   | 0.958       |
| N-Sn (mm)                 | 0.835                                   | 0.082                   | 0.952       |
| Sn-Sto (mm)               | 0.814                                   | 0.544                   | 0.931       |
| ∠Cm-Sn-Ls (°)             | 0.895                                   | 0.622                   | 0.960       |
| Sto-Gn (mm)               | 0.852                                   | 0.717                   | 0.925       |
| Go-Gn (mm)                | 0.756                                   | -0.09                   | 0.941       |
| Pg to N-B (mm)            | 0.966                                   | 0.890                   | 0.989       |
| ∠Li-B-Pg (°)              | 0.935                                   | 0.649                   | 0.978       |
| ∠B-Pg:Submental plane (°) | 0.947                                   | 0.700                   | 0.983       |
| ∠Go (°)                   | 0.755                                   | 0.189                   | 0.925       |
| N-Gn (mm)                 | 0.946                                   | 0.834                   | 0.978       |
| ∠N-Sn-Pg (°)              | 0.904                                   | 0.773                   | 0.956       |
| ∠N-PRn-Pg (°)             | 0.905                                   | 0.812                   | 0.953       |
| H                         | 0.946                                   | 0.864                   | 0.977       |
| L                         | 0.962                                   | 0.921                   | 0.982       |
| W                         | 0.942                                   | 0.868                   | 0.975       |
| AH                        | 0.766                                   | 0.541                   | 0.889       |
| AF                        | 0.877                                   | 0.736                   | 0.946       |
| V                         | 0.830                                   | 0.647                   | 0.924       |

2
